# Supplementary material for: A behavioural correlate of the synaptic eligibility trace in the nucleus accumbens
Source: PubMed Central journal article supplement (PMC8817024; doi:10.1038/s41598-022-05637-6), 2022-02-04
Supplement: 41598_2022_5637_MOESM1_ESM.pdf [file 41598_2022_5637_MOESM1_ESM.pdf]

# **A behavioural correlate of the synaptic eligibility trace in the nucleus accumbens**

Kenji Yamaguchi<sup>1,2</sup>, Yoshitomo Maeda<sup>1,2</sup>, Takeshi Sawada<sup>1,2</sup>, Yusuke Iino<sup>1,2</sup>, Mio Tajiri<sup>1,2</sup>, Ryosuke Nakazato<sup>1,2</sup>, Shin Ishii<sup>2,3</sup>, Haruo Kasai<sup>1,2</sup>, and Sho Yagishita<sup>1,2</sup>

<sup>1</sup>Laboratory of Structural Physiology, Center for Disease Biology and Integrative Medicine, Faculty of Medicine, <sup>2</sup>International Research Center for Neurointelligence (WPI-IRCN), UTIAS, The University of Tokyo, Bunkyo-ku, Tokyo, and <sup>3</sup>Graduate School of Informatics, Kyoto University, Yoshida-Honmachi, Kyoto, Japan

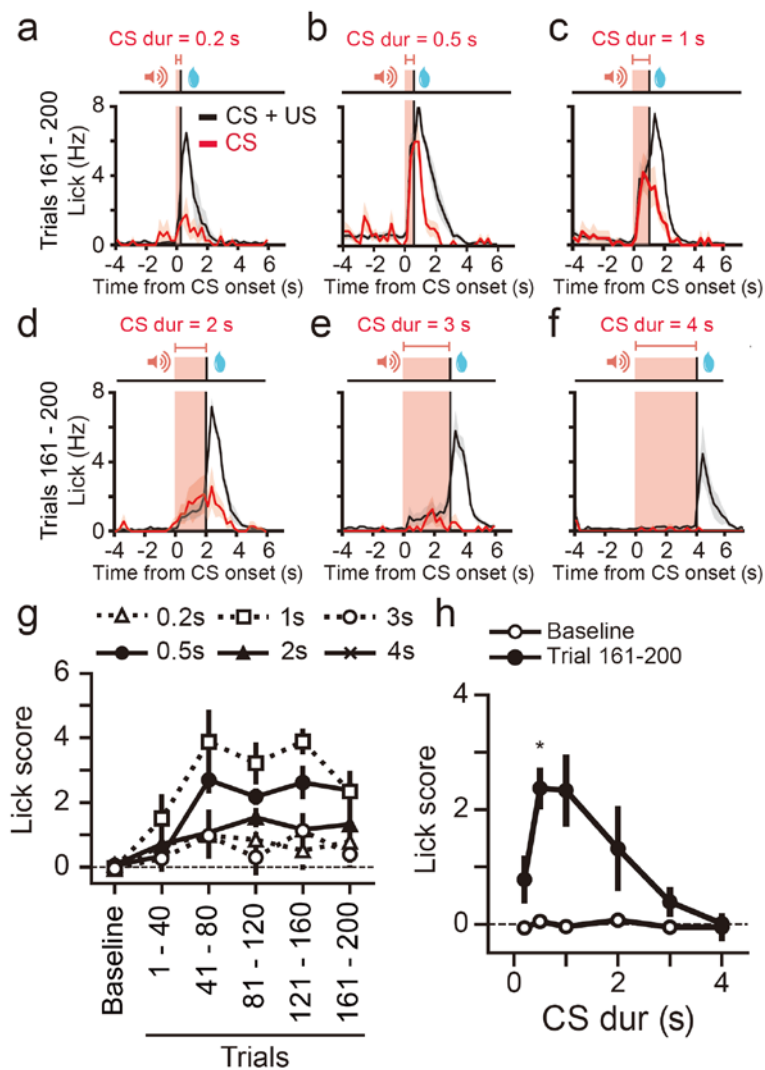

**Figure S1. Conditioning with various CS durations.**

**a–f)** Averaged PSTHs of the licking responses with CS duration of 0.2 s (a,  $n = 4$  mice), 0.5 s (b,  $n = 7$  mice), 1 s (c,  $n = 5$  mice), 2 s (d,  $n = 7$  mice), 3 s (e,  $n = 4$  mice), or 4 s (f,  $n = 5$  mice) during trials 161–200. The plot in (b) is the same as that at the bottom of Fig. 1f and Fig. 2d. Red shades indicate the period of CS presentation.

**g)** The lick scores for each condition are plotted against time. The averaged lick scores in the CS-only trials were plotted against time. Each symbol represents the CS duration.

**h)** The effect of CS duration on conditioning. The averaged lick scores in the CS-only trials included during conditioning trials 161–200 were plotted against CS durations. Wilcoxon signed-rank test. \*  $P < 0.05$ .

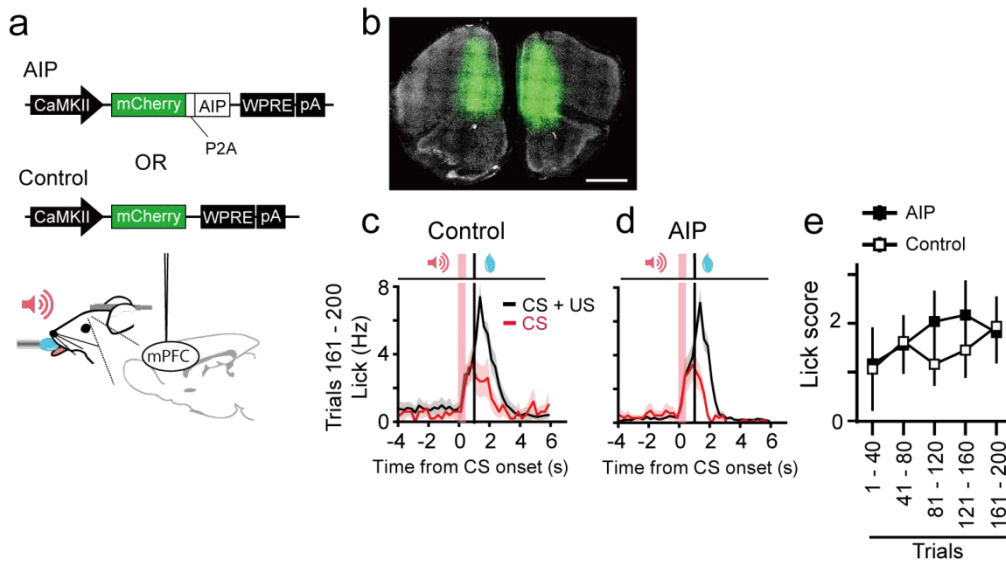

**Figure S2. The effect of a CaMKII inhibitory peptide (AIP) on the mPFC on conditioning.**

**a)** Viral constructs and schematics of the injection.

**b)** Confocal images of mCherry fluorescence (green) and DAPI (white) from a coronal slice, including the PFC. The scale bar indicates 1 mm.

**c, d)** Averaged PSTHs of the licking responses in CS + US (black) and CS (red) conditionings from mice injected with control (d,  $n = 5$  mice) or AIP (c,  $n = 7$  mice).

**e)** The peak lick scores plotted against time for the conditions indicated.

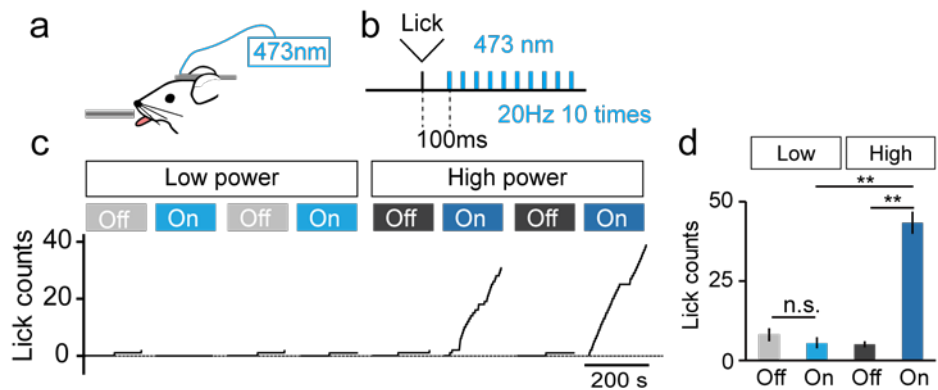

**Figure S3. Operant conditioning with stimulation of the axon terminals from the BLA to the NAc.**

**a, b)** Operant conditioning using stimulation of the axon terminals from the BLA. The lick port detected licking to trigger blue laser stimulation (20 Hz, ten times, 5 ms pulse width) with a delay of 100 ms (b). No water was given during this operant protocol. Laser power was adjusted to 1~3 mW for a low power condition and 5~15 mW for high power condition.

**c)** Representative traces of cumulative licking counts during low power (2.5 mW) and high power (5 mW) conditioning. Conditions with laser-off and on were alternated.

**d)** Averaged total lick counts for the condition indicated. Kruskal–Wallis test  $** P < 0.01$ .

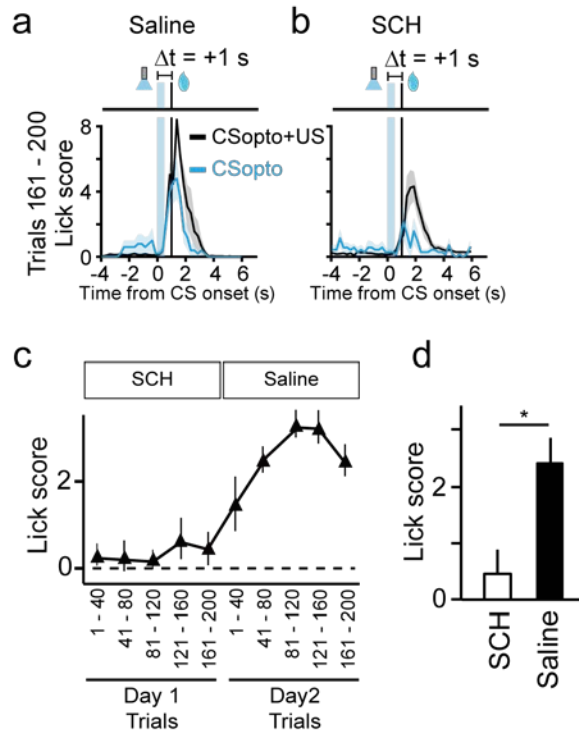

**Figure S4. Effects of a dopamine D1 receptor blocker on Pavlovian conditioning with CSopto.**

**a, b)** Averaged PSTHs of the licking responses during the last 20% of the trials (161–200, bottom) for a dopamine D1 receptor blocker (SCH23390, 0.25 or 0.5 mg/kg, i.p.) (a) or saline (b). On day 1, mice received intraperitoneal injections of SCH23390 before conditioning with CSopto with a delay of +1 s as in Fig. 5. The next day, the mice were administered saline, and the conditioning was repeated.  $n = 5$ .

**c)** Lick scores plotted against time.

**d)** The effect of a dopamine D1 receptor blocker. Averaged lick scores from 4 CS-only trials during trials 161–200 were plotted for each condition. \*  $P < 0.05$ , two-sided Mann-Whitney U test,  $n = 5$  mice.

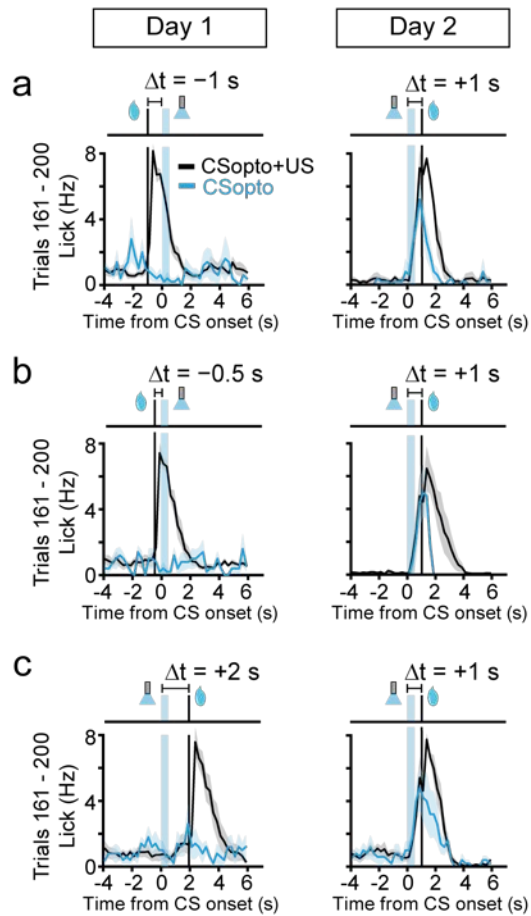

**Figure S5. Positive controls for conditioning with CSopto.**

**a, b, c)** Averaged PSTHs of the licking responses during the last 20% of the trials (161–200, bottom). Mice allocated to  $\Delta t = -1$  s (**a**,  $n = 5$  mice, left),  $\Delta t = -0.5$  s (**b**,  $n = 5$  mice, left), and  $\Delta t = 2$  s (**c**,  $n = 5$  mice, left) on day 1 were conditioned with  $\Delta t = +1$  s on day 2 (right).
